# Supplementary material for: Overexpression of Fatty Acid Synthase Upregulates Glutamine–Fructose-6-Phosphate Transaminase 1 and O-Linked N-Acetylglucosamine Transferase to Increase O-GlcNAc Protein Glycosylation and Promote Colorectal Cancer Growth
Source: MDPI journal article supplement (doi:10.3390/ijms25094883), 2024-04-30
Supplement: s1 [file s1]

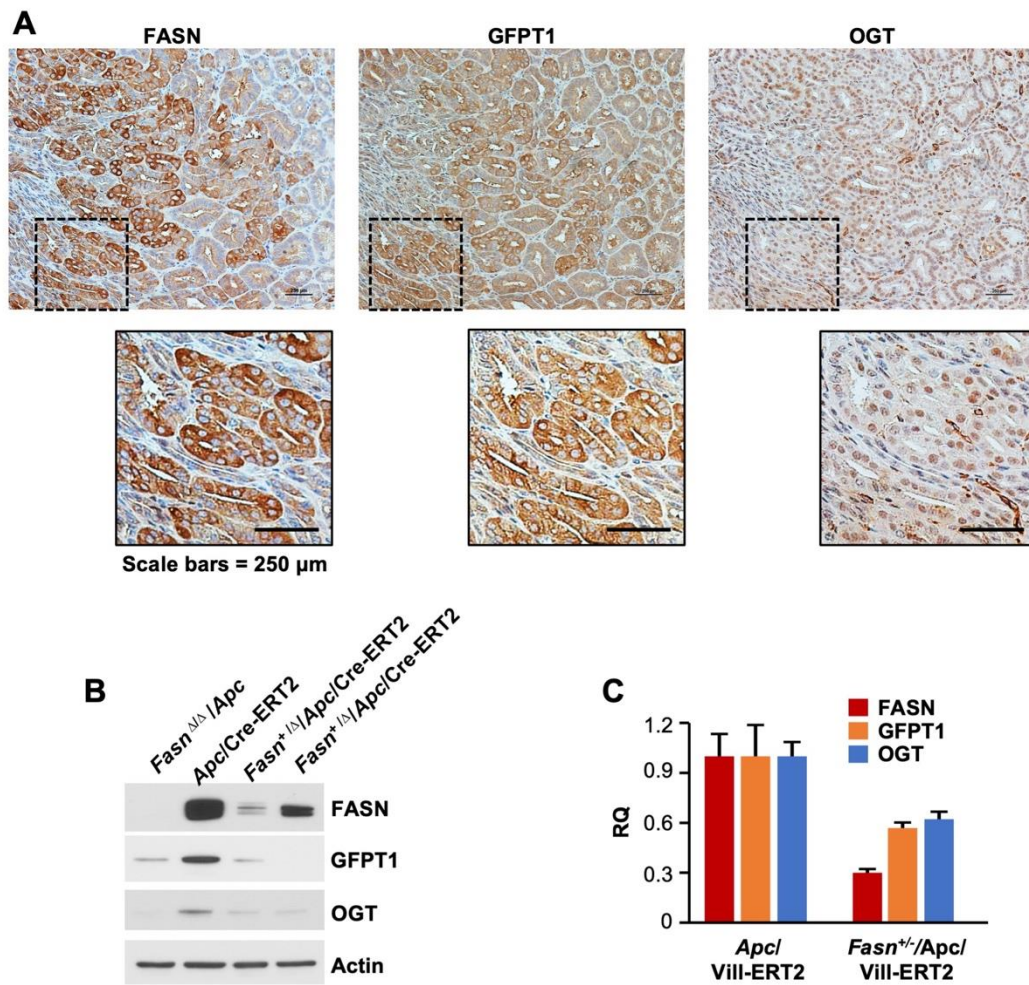

**Supplemental Figure S1. ERT2-mediated deletion of FASN decreases expression of OGT and GFPT1.** (A) IHC staining of *Apc/Cre* intestinal adenoma tissues for FASN, GFPT1 and OGT. Protein (B) and mRNA (C) expression of FASN, GFPT1 and OGT in intestinal tissues in *Apc/VillinCreERT2* and *Apc/Fasn<sup>+/-</sup>/VillinCreERT2* mice.

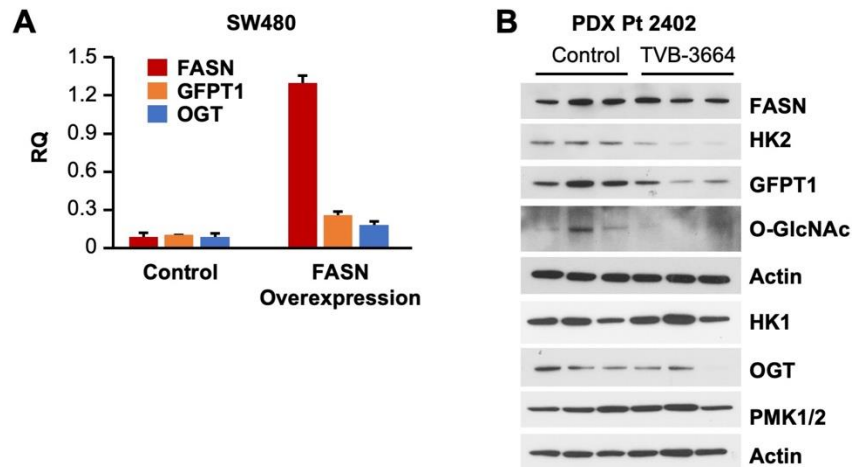

**Supplemental Figure S2. FASN regulates expression of GFPT1 and OGT in human CRC cells.** (A) qRT-PCR showing that overexpression of FASN upregulates GFPT1 and OGT mRNA levels. (B) Pharmacological inhibition of FASN using TVB-3664 decreases the expression of GFPT1 and OGT and the level of O-GlcNAc in the PDX mouse model.

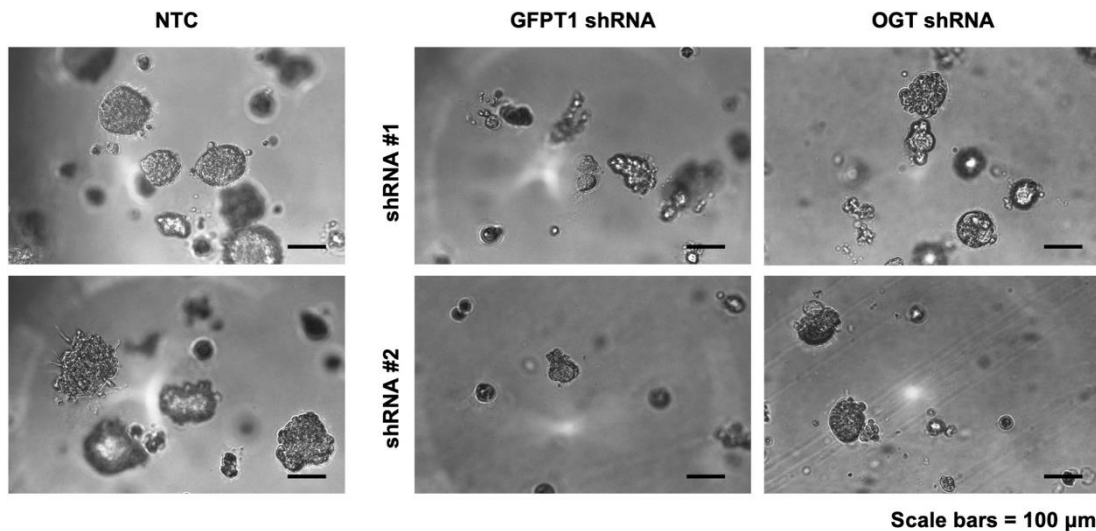

**Supplemental Figure S3.** Representative images of HCT116, NTC, GFPT1 shRNA and OGT shRNA, cells grown in Matrigel for 10 days.

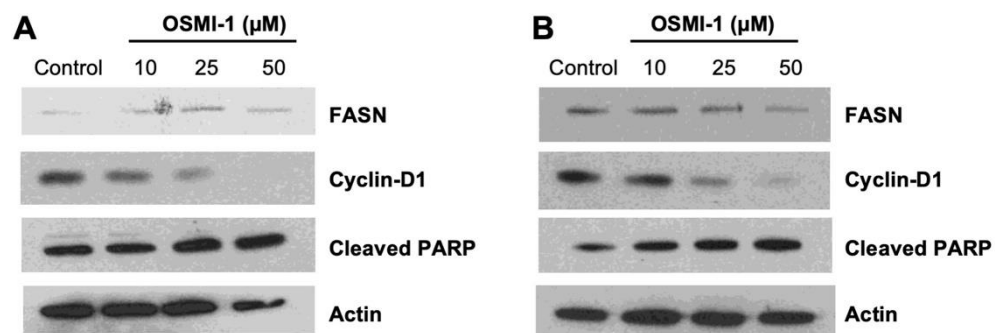

**Supplemental Figure S4. Effects of O-GlcNAc transferase inhibitor on CRC cells.** Western blot showing dose-dependent inhibition of cyclin D and induction of PARP cleavage in Pt130 (A) and Pt93 (B) cell lines by OSMI-1.

**Supplemental Table S1.** Summary of correlations between FASN mRNA level and HK2, GFPT1 and OGT mRNA levels using data from five different publicly available databases.

| Data set              | Gene pair     | Probe use | P value      | Spearman<br>Coefficient ( $\rho$ ) | Correlation   |
|-----------------------|---------------|-----------|--------------|------------------------------------|---------------|
| TCGA-COAD             | FASN vs HK2   | -         | 0.324899608  | 1.13723E-12                        | Significant   |
| Bittner_Colon         | FASN vs HK2   | Maximum   | 0.25718059   | 2.20077E-06                        | Significant   |
| Bittner_Colon         | FASN vs HK2   | Average   | 0.226399107  | 3.3079E-05                         | Significant   |
| Jorissen_Colorectal_3 | FASN vs HK2   | Maximum   | 0.203873119  | 0.011210113                        | Significant   |
| Jorissen_Colorectal_3 | FASN vs HK2   | Average   | 0.209525452  | 0.009108027                        | Significant   |
| Kaiser_Colon          | FASN vs HK2   | Maximum   | 0.35548088   | 0.000284065                        | Significant   |
| Kaiser_Colon          | FASN vs HK2   | Average   | 0.393497711  | 5.11824E-05                        | Significant   |
| Ki_Colon              | FASN vs HK2   | Maximum   | 0.102808071  | 0.463832084                        | Insignificant |
| Ki_Colon              | FASN vs HK2   | Average   | 0.015280102  | 0.913524096                        | Insignificant |
| TCGA-COAD             | FASN vs GFPT1 | -         | -0.003472998 | 0.941042518                        | Insignificant |
| Bittner_Colon         | FASN vs GFPT1 | Maximum   | 0.417345681  | 2.43541E-15                        | Significant   |
| Bittner_Colon         | FASN vs GFPT1 | Average   | 0.222043779  | 4.71686E-05                        | Significant   |
| Jorissen_Colorectal_3 | FASN vs GFPT1 | Maximum   | 0.213324856  | 0.00789863                         | Significant   |
| Jorissen_Colorectal_3 | FASN vs GFPT1 | Average   | 0.1567461    | 0.052217361                        | Insignificant |
| Kaiser_Colon          | FASN vs GFPT1 | Maximum   | 0.321671062  | 0.001100603                        | Significant   |
| Kaiser_Colon          | FASN vs GFPT1 | Average   | 0.438814514  | 4.95166E-06                        | Significant   |
| Ki_Colon              | FASN vs GFPT1 | Maximum   | 0.333588679  | 0.014645743                        | Significant   |
| Ki_Colon              | FASN vs GFPT1 | Average   | 0.333588679  | 0.014645743                        | Significant   |
| TCGA-COAD             | FASN vs OGT   | -         | 0.025906755  | 0.581091482                        | Insignificant |
| Bittner_Colon         | FASN vs OGT   | Maximum   | 0.383606995  | 5.19062E-13                        | Significant   |
| Bittner_Colon         | FASN vs OGT   | Average   | 0.128322574  | 0.019706026                        | Significant   |
| Jorissen_Colorectal_3 | FASN vs OGT   | Maximum   | -0.147712599 | 0.067523682                        | Insignificant |
| Jorissen_Colorectal_3 | FASN vs OGT   | Average   | 0.043321258  | 0.593706068                        | Insignificant |
| Kaiser_Colon          | FASN vs OGT   | Maximum   | 0.246299802  | 0.013503282                        | Significant   |
| Kaiser_Colon          | FASN vs OGT   | Average   | 0.094174265  | 0.351348935                        | Insignificant |
| Ki_Colon              | FASN vs OGT   | Maximum   | 0.08208519   | 0.559000311                        | Insignificant |
| Ki_Colon              | FASN vs OGT   | Average   | 0.08208519   | 0.559000311                        | Insignificant |
